# Supplementary material for: Genomic Prediction of Breeding Values Using a Subset of SNPs Identified by Three Machine Learning Methods
Source: PubMed Central journal article supplement (PMC6039760; doi:10.3389/fgene.2018.00237), 2018-07-04
Supplement: Table_1.pdf [file Table_1.pdf]

## Supplementary Material

**Supplementary Table S1.** Average diagonal and off diagonal values of genomic relationship matrices (GRMs) constructed from subsets of SNPs of Brahman cow population

| Marker                | Diagonal |       |      |      | Off-diagonal |       |        |      |
|-----------------------|----------|-------|------|------|--------------|-------|--------|------|
|                       | Mean     | STD   | Min  | Max  | Mean         | STD   | Min    | Max  |
| AllSNP                | 1.01     | 0.059 | 0.87 | 1.29 | -0.0010      | 0.048 | -0.010 | 0.65 |
| RF400                 | 1.03     | 0.10  | 0.73 | 1.37 | -0.0010      | 0.082 | -0.34  | 0.74 |
| RF1000                | 1.02     | 0.071 | 0.83 | 1.34 | -0.0010      | 0.065 | -0.23  | 0.74 |
| RF3000                | 1.01     | 0.051 | 0.86 | 1.25 | -0.0010      | 0.053 | -0.15  | 0.68 |
| RF18453 <sup>†</sup>  | 1.01     | 0.058 | 0.87 | 1.28 | -0.0010      | 0.049 | -0.096 | 0.65 |
| GBM400                | 1.01     | 0.085 | 0.73 | 1.40 | -0.0010      | 0.075 | -0.29  | 0.70 |
| GBM1000               | 1.01     | 0.064 | 0.86 | 1.32 | -0.0010      | 0.060 | -0.20  | 0.70 |
| GBM3000               | 1.01     | 0.043 | 0.89 | 1.23 | -0.0010      | 0.052 | -0.15  | 0.68 |
| GBM16600 <sup>†</sup> | 1.01     | 0.036 | 0.92 | 1.18 | -0.0010      | 0.049 | -0.10  | 0.65 |
| Xgb400                | 1.01     | 0.075 | 0.80 | 1.37 | -0.0010      | 0.073 | -0.32  | 0.73 |
| Xgb1000               | 1.01     | 0.054 | 0.86 | 1.25 | -0.0010      | 0.061 | -0.23  | 0.67 |
| Xgb3000               | 1.00     | 0.041 | 0.91 | 1.22 | -0.0010      | 0.053 | -0.14  | 0.64 |
| Xgb9122 <sup>†</sup>  | 1.00     | 0.036 | 0.92 | 1.17 | -0.0010      | 0.050 | -0.11  | 0.65 |
| Even400               | 1.01     | 0.10  | 0.77 | 1.43 | -0.0010      | 0.078 | -0.30  | 0.77 |
| Even1000              | 1.01     | 0.081 | 0.82 | 1.38 | -0.0010      | 0.061 | -0.23  | 0.67 |
| Even3000              | 1.00     | 0.063 | 0.86 | 1.25 | -0.0010      | 0.052 | -0.17  | 0.62 |

RF – Random Forests; GBM – Gradient Boosting Machine, XgBoost – Extreme Gradient Boosting; Even – evenly spaced along the genome; <sup>†</sup> The SNPs with positive variable importance values.

**Supplementary Table S2.** Average diagonal and off-diagonal values of inversed genomic relationship matrices (GRMs) constructed from subsets of SNPs of Brahman cow population

| Marker   | Diagonal |      |       |       | Off diagonal |       |       |      |
|----------|----------|------|-------|-------|--------------|-------|-------|------|
|          | Mean     | STD  | Min   | Max   | Mean         | STD   | Min   | Max  |
| AllSNP   | 1.79     | 0.25 | 1.12  | 2.73  | 0.018        | 0.032 | -1.15 | 0.29 |
| RF400    | 12.62    | 0.70 | 9.89  | 14.55 | 0.007        | 0.29  | -3.64 | 1.48 |
| RF1000   | 5.90     | 0.61 | 4.05  | 7.70  | 0.014        | 0.20  | -2.92 | 0.96 |
| RF3000   | 2.55     | 0.33 | 1.74  | 3.75  | 0.018        | 0.066 | -1.55 | 0.42 |
| RF18453  | 1.85     | 0.26 | 1.17  | 2.85  | 0.018        | 0.035 | -1.17 | 0.31 |
| GBM400   | 12.55    | 0.71 | 10.02 | 14.60 | 0.007        | 0.29  | -3.36 | 1.36 |
| GBM1000  | 5.68     | 0.59 | 3.91  | 7.42  | 0.014        | 0.20  | -2.85 | 0.88 |
| GBM3000  | 2.46     | 0.31 | 1.641 | 3.72  | 0.018        | 0.062 | -1.53 | 0.39 |
| GBM16600 | 1.84     | 0.24 | 1.26  | 2.85  | 0.018        | 0.035 | -1.13 | 0.29 |
| Xgb400   | 12.48    | 0.63 | 9.82  | 14.39 | 0.008        | 0.29  | -3.31 | 1.47 |
| Xgb1000  | 5.57     | 0.56 | 4.002 | 7.29  | 0.014        | 0.19  | -2.97 | 0.88 |
| Xgb3000  | 2.55     | 0.32 | 1.762 | 3.97  | 0.018        | 0.065 | -1.66 | 0.40 |
| Xgb9122  | 1.98     | 0.26 | 1.352 | 3.08  | 0.018        | 0.040 | -1.25 | 1.00 |
| Even400  | 12.77    | 0.91 | 9.09  | 14.95 | 0.007        | 0.284 | -3.79 | 1.18 |
| Even1000 | 6.19     | 0.73 | 3.63  | 8.38  | 0.014        | 0.21  | -3.09 | 0.96 |
| Even3000 | 2.69     | 0.37 | 1.67  | 4.02  | 0.017        | 0.071 | -1.65 | 0.47 |

RF – Random Forests; GBM – Gradient Boosting Machine, XgBoost – Extreme Gradient Boosting; Even – evenly spaced along the genome; † The SNPs with positive variable importance values.

**Supplementary Table S3.** Five-fold cross-validation scheme - individual subset estimates of heritability ( $h^2$ ) and additive genetic variances ( $\sigma_a^2$ ) explained by different subsets of SNPs from Brahman cow population.

| <b>Marker</b> | $\sigma_a^2$ | <b>SD</b> | $\sigma_e^2$ | <b>SD</b> | $\sigma_p^2$ | <b>SD</b> | $h^2$ | <b>SD</b> |
|---------------|--------------|-----------|--------------|-----------|--------------|-----------|-------|-----------|
| RF400_R1      | 38.66        | 21.31     | 574.75       | 34.18     | 613.41       | 31.52     | 0.063 | 0.035     |
| RF400_R2      | 45.05        | 21.59     | 553.42       | 33.07     | 598.48       | 30.82     | 0.075 | 0.036     |
| RF400_R3      | 31.42        | 19.39     | 559.89       | 32.95     | 591.31       | 30.31     | 0.053 | 0.033     |
| RF400_R4      | 30.21        | 17.75     | 555.51       | 32.14     | 585.72       | 30.01     | 0.052 | 0.030     |
| RF400_R5      | 39.94        | 21.06     | 573          | 33.98     | 612.94       | 31.49     | 0.065 | 0.034     |
| average       | 37.06        | 20.22     | 563.31       | 33.26     | 600.37       | 30.83     | 0.062 | 0.034     |
| RF1000_R1     | 57.9         | 28.25     | 555.6        | 36.9      | 613.5        | 31.64     | 0.094 | 0.046     |
| RF1000_R2     | 61.95        | 27.8      | 536.79       | 35.7      | 598.74       | 30.91     | 0.10  | 0.046     |
| RF1000_R3     | 35.84        | 23.08     | 555.29       | 34.93     | 591.13       | 30.27     | 0.061 | 0.039     |
| RF1000_R4     | 35.00        | 21.64     | 551.14       | 34.05     | 586.15       | 30.02     | 0.060 | 0.037     |
| RF1000_R5     | 51.05        | 26.42     | 562          | 36.47     | 613.05       | 31.52     | 0.083 | 0.043     |
| average       | 48.35        | 25.44     | 552.16       | 35.61     | 600.51       | 30.87     | 0.080 | 0.042     |
| RF3000_R1     | 78.84        | 35.57     | 534.86       | 40.68     | 613.71       | 31.76     | 0.13  | 0.057     |
| RF3000_R2     | 83.13        | 36.13     | 516.94       | 40.22     | 600.08       | 31.12     | 0.14  | 0.059     |
| RF3000_R3     | 41.49        | 28.44     | 550.04       | 38.07     | 591.53       | 30.29     | 0.070 | 0.048     |
| RF3000_R4     | 64.58        | 31.45     | 522          | 38.07     | 586.57       | 30.24     | 0.11  | 0.053     |
| RF3000_R5     | 72.98        | 33.89     | 540.28       | 40.07     | 613.26       | 31.65     | 0.12  | 0.055     |
| average       | 68.20        | 33.10     | 532.82       | 39.42     | 601.03       | 31.01     | 0.11  | 0.055     |
| RF18453_R1    | 80.31        | 39.26     | 533.17       | 43.69     | 613.48       | 31.7      | 0.13  | 0.064     |
| RF18453_R2    | 90.46        | 41.95     | 510.4        | 44.46     | 600.87       | 31.18     | 0.15  | 0.069     |
| RF18453_R3    | 46.38        | 32.07     | 545.07       | 40.38     | 591.45       | 30.29     | 0.078 | 0.055     |
| RF18453_R4    | 60.17        | 33.83     | 526.62       | 40.41     | 586.79       | 30.17     | 0.10  | 0.058     |
| RF18453_R5    | 80.9         | 40.22     | 533.22       | 44.43     | 614.12       | 31.73     | 0.13  | 0.065     |
| average       | 71.64        | 37.47     | 529.70       | 42.67     | 601.34       | 31.01     | 0.12  | 0.062     |
| GBM400_R1     | 48.41        | 22.64     | 564.63       | 33.98     | 613.03       | 31.62     | 0.079 | 0.037     |
| GBM400_R2     | 45.19        | 22.19     | 554.25       | 33.4      | 599.44       | 30.88     | 0.075 | 0.037     |
| GBM400_R3     | 28.7         | 19.432    | 562.94       | 33.26     | 591.65       | 30.29     | 0.049 | 0.033     |
| GBM400_R4     | 64.76        | 23.17     | 520.29       | 31.63     | 585.05       | 30.47     | 0.11  | 0.039     |
| GBM400_R5     | 26.97        | 18.84     | 586.32       | 34.16     | 613.29       | 31.37     | 0.044 | 0.031     |
| average       | 42.81        | 21.25     | 557.69       | 33.29     | 600.49       | 30.93     | 0.072 | 0.035     |
| GBM1000_R1    | 74.28        | 30.39     | 538.92       | 36.93     | 613.2        | 31.8      | 0.12  | 0.049     |
| GBM1000_R2    | 74.68        | 31.05     | 525.81       | 36.73     | 600.49       | 31.18     | 0.12  | 0.051     |
| GBM1000_R3    | 46.14        | 25.6      | 545.24       | 35.56     | 591.38       | 30.36     | 0.078 | 0.043     |
| GBM1000_R4    | 70.51        | 27.92     | 515.23       | 34.74     | 585.74       | 30.35     | 0.12  | 0.047     |
| GBM1000_R5    | 52.46        | 27.2      | 560.88       | 36.89     | 613.34       | 31.53     | 0.086 | 0.044     |
| average       | 63.61        | 28.43     | 537.22       | 36.17     | 600.83       | 31.044    | 0.11  | 0.047     |
| GBM3000_R1    | 85.36        | 36.67     | 528          | 41.06     | 613.36       | 31.79     | 0.14  | 0.059     |
| GBM3000_R2    | 109.13       | 40.92     | 493.01       | 41.81     | 602.14       | 31.57     | 0.18  | 0.066     |
| GBM3000_R3    | 76.96        | 35.03     | 514.91       | 39.82     | 591.87       | 30.62     | 0.13  | 0.059     |
| GBM3000_R4    | 65.91        | 32.77     | 521.1        | 38.91     | 587          | 30.28     | 0.11  | 0.056     |
| GBM3000_R5    | 76.08        | 36.17     | 538.04       | 41.47     | 614.12       | 31.73     | 0.12  | 0.058     |
| average       | 82.69        | 36.31     | 519.01       | 40.61     | 601.70       | 31.20     | 0.14  | 0.060     |

|             |        |        |        |        |        |        |        |        |
|-------------|--------|--------|--------|--------|--------|--------|--------|--------|
| GBM16600_R1 | 81.66  | 39.45  | 531.68 | 43.72  | 613.34 | 31.71  | 0.13   | 0.064  |
| GBM16600_R2 | 94.34  | 42.57  | 506.69 | 44.66  | 601.04 | 31.24  | 0.16   | 0.070  |
| GBM16600_R3 | 56.83  | 34.58  | 534.77 | 41.32  | 591.6  | 30.38  | 0.096  | 0.059  |
| GBM16600_R4 | 57.06  | 33.27  | 529.79 | 40.22  | 586.84 | 30.16  | 0.097  | 0.057  |
| GBM16600_R5 | 80.19  | 40.38  | 534.09 | 44.57  | 614.27 | 31.74  | 0.13   | 0.065  |
| average     | 74.02  | 38.05  | 527.40 | 42.90  | 601.42 | 31.04  | 0.13   | 0.063  |
| Xgb400_R1   | 32.17  | 20.52  | 581.1  | 34.45  | 613.27 | 31.42  | 0.053  | 0.034  |
| Xgb400_R2   | 21.51  | 19.73  | 578.29 | 34.36  | 599.81 | 30.64  | 0.036  | 0.033  |
| Xgb400_R3   | 22.81  | 18.2   | 568.75 | 33.21  | 591.56 | 30.24  | 0.039  | 0.031  |
| Xgb400_R4   | 17.74  | 18.05  | 569.93 | 33.39  | 587.67 | 30.03  | 0.030  | 0.031  |
| Xgb400_R5   | 23.43  | 20.44  | 590.69 | 35.18  | 614.12 | 31.4   | 0.038  | 0.034  |
| average     | 23.53  | 19.39  | 577.75 | 34.12  | 601.29 | 30.75  | 0.039  | 0.033  |
| Xgb1000_R1  | 37.1   | 24.83  | 576.07 | 36.73  | 613.18 | 31.4   | 0.061  | 0.041  |
| Xgb1000_R2  | 48.91  | 28.12  | 551.27 | 37.06  | 600.19 | 30.85  | 0.082  | 0.047  |
| Xgb1000_R3  | 36.32  | 24.34  | 555.17 | 35.63  | 591.48 | 30.29  | 0.061  | 0.041  |
| Xgb1000_R4  | 31.09  | 23.66  | 556.44 | 35.46  | 587.53 | 30.08  | 0.053  | 0.041  |
| Xgb1000_R5  | 34.14  | 26.08  | 579.97 | 37.7   | 614.11 | 31.44  | 0.056  | 0.043  |
| average     | 37.51  | 25.41  | 563.78 | 36.52  | 601.30 | 30.81  | 0.062  | 0.042  |
| Xgb3000_R1  | 52.68  | 30.07  | 560.22 | 38.94  | 612.9  | 31.47  | 0.086  | 0.049  |
| Xgb3000_R2  | 46.68  | 30.56  | 553.22 | 39.15  | 599.91 | 30.77  | 0.078  | 0.051  |
| Xgb3000_R3  | 32.64  | 26.07  | 558.99 | 37.17  | 591.64 | 30.25  | 0.055  | 0.044  |
| Xgb3000_R4  | 33.32  | 26.11  | 554.11 | 36.95  | 587.43 | 30.07  | 0.057  | 0.045  |
| Xgb3000_R5  | 43.98  | 29.73  | 569.83 | 39.43  | 613.81 | 31.46  | 0.072  | 0.049  |
| average     | 41.86  | 28.51  | 559.27 | 38.33  | 601.14 | 30.80  | 0.070  | 0.048  |
| Xgb9122_R1  | 79.99  | 37.4   | 533.04 | 42.12  | 613.03 | 31.7   | 0.13   | 0.060  |
| Xgb9122_R2  | 80.81  | 38.66  | 519.68 | 42.46  | 600.49 | 31.09  | 0.14   | 0.064  |
| Xgb9122_R3  | 54.23  | 32.25  | 537.19 | 39.72  | 591.41 | 30.37  | 0.092  | 0.055  |
| Xgb9122_R4  | 51.65  | 30.83  | 535.21 | 38.78  | 586.86 | 30.14  | 0.088  | 0.053  |
| Xgb9122_R5  | 80.69  | 38.28  | 533.21 | 42.76  | 613.89 | 31.75  | 0.13   | 0.062  |
| average     | 69.47  | 35.48  | 531.67 | 41.17  | 601.13 | 31.01  | 0.12   | 0.059  |
| Even400_R1  | 33.1   | 20.55  | 597.38 | 35.06  | 630.48 | 32.32  | 0.053  | 0.033  |
| Even400_R2  | 28.61  | 19.07  | 563.03 | 32.99  | 591.63 | 30.31  | 0.0483 | 0.0328 |
| Even400_R3  | 10.54  | 16.38  | 584.9  | 33.56  | 595.43 | 30.37  | 0.018  | 0.028  |
| Even400_R4  | 13.32  | 16.87  | 561.88 | 32.61  | 575.1  | 29.35  | 0.023  | 0.030  |
| Even400_R5  | 28.6   | 20.41  | 583.86 | 34.56  | 612.46 | 31.37  | 0.047  | 0.0338 |
| average     | 22.834 | 18.656 | 578.21 | 33.756 | 601.02 | 30.744 | 0.038  | 0.0318 |
| Even1000_R1 | 39.17  | 24.2   | 590.47 | 36.97  | 629.64 | 32.23  | 0.0629 | 0.039  |
| Even1000_R2 | 35.37  | 24.17  | 556.1  | 35.57  | 591.46 | 30.29  | 0.060  | 0.0417 |
| Even1000_R3 | 16.39  | 21.56  | 579    | 35.86  | 595.39 | 30.38  | 0.028  | 0.037  |
| Even1000_R4 | 35.87  | 23.15  | 538.69 | 34.26  | 574.56 | 29.43  | 0.062  | 0.040  |
| Even1000_R5 | 41.84  | 26.46  | 570.35 | 37.24  | 612.19 | 31.39  | 0.068  | 0.043  |
| average     | 33.728 | 23.91  | 566.93 | 35.98  | 600.65 | 30.745 | 0.056  | 0.040  |
| Even3000_R1 | 76.61  | 34.59  | 552.92 | 40.62  | 629.53 | 32.55  | 0.12   | 0.054  |
| Even3000_R2 | 43.13  | 27.06  | 548.07 | 37.2   | 591.2  | 30.31  | 0.073  | 0.047  |
| Even3000_R3 | 36.32  | 28.99  | 559.47 | 38.7   | 595.78 | 30.52  | 0.061  | 0.049  |
| Even3000_R4 | 71.74  | 31.86  | 502.82 | 37.08  | 574.56 | 29.74  | 0.13   | 0.055  |
| Even3000_R5 | 62.86  | 33.12  | 549.67 | 40.02  | 612.52 | 31.58  | 0.10   | 0.054  |
| average     | 58.13  | 31.124 | 542.59 | 38.72  | 600.72 | 30.94  | 0.097  | 0.052  |

|            |       |       |        |       |        |       |       |       |
|------------|-------|-------|--------|-------|--------|-------|-------|-------|
| AllSNP _R1 | 85.53 | 40.62 | 527.83 | 44.42 | 613.37 | 31.73 | 0.14  | 0.066 |
| AllSNP _R2 | 99.80 | 43.53 | 500.99 | 45.16 | 600.79 | 31.25 | 0.17  | 0.071 |
| AllSNP _R3 | 55.17 | 34.21 | 536.14 | 41.3  | 591.3  | 30.33 | 0.093 | 0.058 |
| AllSNP _R4 | 58.89 | 33.55 | 527.66 | 40.38 | 586.55 | 30.13 | 0.10  | 0.057 |
| AllSNP _R5 | 82.67 | 40.63 | 531.19 | 44.74 | 613.86 | 31.71 | 0.14  | 0.066 |
| average    | 76.41 | 38.51 | 524.76 | 43.2  | 601.17 | 31.03 | 0.13  | 0.064 |

RF – Random Forests; GBM – Gradient Boosting Machine, XgBoost – Extreme Gradient Boosting; Even – evenly spaced along the genome;  $h^2$  – heritability;  $\sigma_e^2$  – residual variance. † The SNPs with positive variable importance values.

**Supplementary Table S4.** Five-fold cross-validation scheme - individual subset estimates of average accuracy of genomic prediction by different subsets of SNPs from Brahman cow population

| <b>Marker</b> | <b>Accuracy</b> |
|---------------|-----------------|
| RF400_R1      | 0.416           |
| RF400_R2      | 0.321           |
| RF400_R3      | 0.427           |
| RF400_R4      | 0.350           |
| RF400_R5      | 0.252           |
| average       | 0.353           |
| RF1000_R1     | 0.336           |
| RF1000_R2     | 0.278           |
| RF1000_R3     | 0.513           |
| RF1000_R4     | 0.408           |
| RF1000_R5     | 0.278           |
| average       | 0.363           |
| RF3000_R1     | 0.366           |
| RF3000_R2     | 0.361           |
| RF3000_R3     | 0.679           |
| RF3000_R4     | 0.368           |
| RF3000_R5     | 0.290           |
| average       | 0.413           |
| RF18453_R1    | 0.371           |
| RF18453_R2    | 0.332           |
| RF18453_R3    | 0.631           |
| RF18453_R4    | 0.473           |
| RF18453_R5    | 0.294           |
| average       | 0.420           |
| GBM400_R1     | 0.345           |
| GBM400_R2     | 0.318           |
| GBM400_R3     | 0.599           |
| GBM400_R4     | 0.080           |
| GBM400_R5     | 0.475           |
| average       | 0.363           |
| GBM1000_R1    | 0.388           |
| GBM1000_R2    | 0.390           |
| GBM1000_R3    | 0.609           |
| GBM1000_R4    | 0.241           |
| GBM1000_R5    | 0.479           |
| average       | 0.421           |
| GBM3000_R1    | 0.441           |
| GBM3000_R2    | 0.358           |
| GBM3000_R3    | 0.526           |
| GBM3000_R4    | 0.533           |
| GBM3000_R5    | 0.448           |
| average       | 0.461           |
| GBM16600_R1   | 0.361           |

|             |       |
|-------------|-------|
| GBM16600_R2 | 0.321 |
| GBM16600_R3 | 0.567 |
| GBM16600_R4 | 0.487 |
| GBM16600_R5 | 0.346 |
| average     | 0.416 |
| <hr/>       |       |
| Xgb400_R1   | 0.099 |
| Xgb400_R2   | 0.196 |
| Xgb400_R3   | 0.280 |
| Xgb400_R4   | 0.286 |
| Xgb400_R5   | 0.154 |
| average     | 0.203 |
| <hr/>       |       |
| Xgb1000_R1  | 0.287 |
| Xgb1000_R2  | 0.106 |
| Xgb1000_R3  | 0.343 |
| Xgb1000_R4  | 0.305 |
| Xgb1000_R5  | 0.241 |
| average     | 0.256 |
| <hr/>       |       |
| Xgb3000_R1  | 0.166 |
| Xgb3000_R2  | 0.299 |
| Xgb3000_R3  | 0.506 |
| Xgb3000_R4  | 0.402 |
| Xgb3000_R5  | 0.269 |
| average     | 0.328 |
| <hr/>       |       |
| Xgb9122_R1  | 0.279 |
| Xgb9122_R2  | 0.341 |
| Xgb9122_R3  | 0.573 |
| Xgb9122_R4  | 0.513 |
| Xgb9122_R5  | 0.260 |
| average     | 0.393 |
| <hr/>       |       |
| Even400_R1  | 0.202 |
| Even400_R2  | 0.084 |
| Even400_R3  | 0.204 |
| Even400_R4  | 0.223 |
| Even400_R5  | 0.165 |
| average     | 0.176 |
| <hr/>       |       |
| Even1000_R1 | 0.012 |
| Even1000_R2 | 0.181 |
| Even1000_R3 | 0.366 |
| Even1000_R4 | 0.216 |
| Even1000_R5 | 0.299 |
| average     | 0.215 |
| <hr/>       |       |
| Even3000_R1 | 0.025 |
| Even3000_R2 | 0.308 |
| Even3000_R3 | 0.499 |
| Even3000_R4 | 0.177 |
| Even3000_R5 | 0.440 |
| average     | 0.290 |
| <hr/>       |       |
| AllSNP_R1   | 0.375 |
| AllSNP_R2   | 0.293 |

|            |       |
|------------|-------|
| AllSNP _R3 | 0.612 |
| AllSNP _R4 | 0.501 |
| AllSNP _R5 | 0.342 |
| average    | 0.425 |

---
